# Supplementary material for: Estimating errors in vehicle secondary aerosol production factors due to oxidation flow reactor response time
Source: Copernicus journal article supplement (doi:10.5194/amt-17-3219-2024), 2024-05-28
Supplement: Supplementary file 13 [file amt-17-3219-2024-supplement.zip]

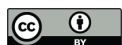

## *Supplement of*

# **Estimating errors in vehicle secondary aerosol production factors due to oxidation flow reactor response time**

**Pauli Simonen et al.**

*Correspondence to:* Pauli Simonen (pauli.simonen@tuni.fi)

- amt-17-3219-2024-supplement-title-page.pdf
- dataAndCode
  - classes
    - \* Cycle.m
    - \* Ofr.m
  - data
    - \* coldNedc.csv
    - \* coldNedc.mat
    - \* deconvolutions
    - \* hotNedc.csv
    - \* hotNedc.mat
    - \* monteCarlo
    - \* nedcSpeed.mat
  - documentation.pdf
  - examples
    - \* deconvolutionTest.m
    - \* ex1.m
    - \* ex2.m
  - exportedFigures
    - \* Thumbs.db
    - \* fig2.pdf
    - \* fig3.pdf
    - \* fig4.pdf
    - \* fig5.pdf
    - \* fig6.pdf
    - \* fig7.pdf
    - \* fig8.pdf

- \* fig9.png
- \* figS10.pdf
- \* figS11.pdf
- \* figS12.pdf
- \* figS13.pdf
- \* figS15.pdf
- \* figS16.pdf
- \* figS2.pdf
- \* figS3.pdf
- functions
  - \* binCycleData.m
  - \* boxchart\_ps.m
  - \* calcDofrRtd.m
  - \* calcPamRtd.m
  - \* createMonteCarloData.m
  - \* createRandomCycle.m
  - \* handleBinnedData.m
  - \* plotBinPatches.m
  - \* plotSpeedPatch.m
  - \* ppmTo1Cm3.m
  - \* randb.m
  - \* simulateRtd.m
  - \* smoothsquare.m
  - \* smoothstep.m
- plotScripts
  - \* plotFig2.m
  - \* plotFig3.m
  - \* plotFig4.m
  - \* plotFig5.m
  - \* plotFig6.m
  - \* plotFig7.m
  - \* plotFig8.m
  - \* plotFig9.m
  - \* plotFigS10.m
  - \* plotFigS11.m
  - \* plotFigS12.m
  - \* plotFigS13.m
  - \* plotFigS14.m
  - \* plotFigS15.m
  - \* plotFigS16.m
  - \* plotFigS2.m
  - \* plotFigS3.m

- supplement.pdf

The copyright of individual parts of the supplement might differ from the article licence.
